# Supplementary material for: Acidic tumor microenvironment-sensitive liposomes enhance colorectal cancer therapy by acting on both tumor cells and cancer-associated fibroblasts
Source: Royal Society of Chemistry journal article supplement (doi:10.1039/d1nr01506k), 2021-01-01
Supplement: d1nr01506k2.pdf [file d1nr01506k2.pdf]

## Tumor microenvironment acid-sensitive liposomes enhanced colorectal cancer therapy by acting on both tumor cells and cancer-associated fibroblasts

Chenglei Li<sup>a</sup>, Zhaohuan Li<sup>a</sup>, Xue Gong<sup>b</sup>, Jianhao Liu<sup>a</sup>, Tingyue Zheng<sup>a</sup>, Fangqing Wang<sup>b</sup>, Jingliang Wu<sup>\*b</sup> and Bo Zhang<sup>\*a</sup>

<sup>a</sup>School of Pharmacy, Weifang Medical University, Weifang, Shandong, 260153, China

<sup>b</sup>School of Bioscience and Technology, Weifang Medical University, Weifang, Shandong, 261053, China

\*Corresponding authors: Email: jlwu2008@163.com (Jingliang Wu) and zhangbo@wfmuc.edu.cn (Bo Zhang)

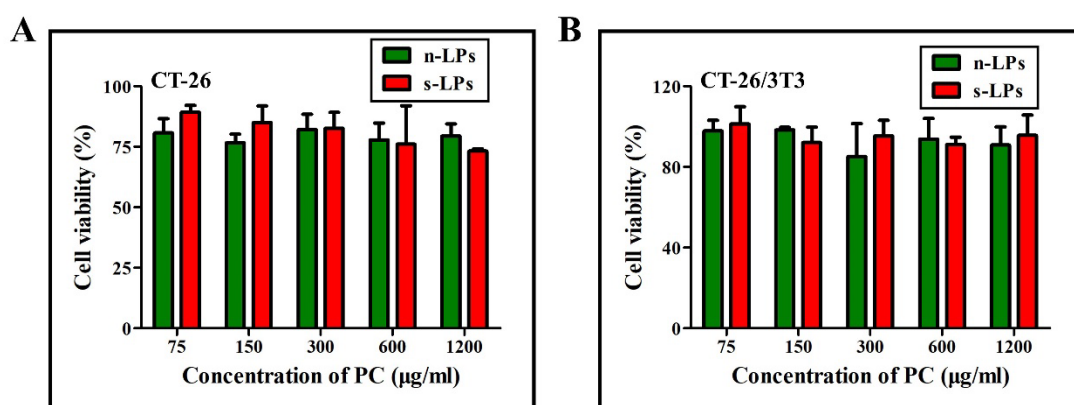

**Fig.S1** The cytotoxicity of both blank n-LPs and s-LPs against CT-26 alone (A) and CT-26/3T3 co-cultured system (B), respectively. (The data are expressed as the mean  $\pm$  SD)

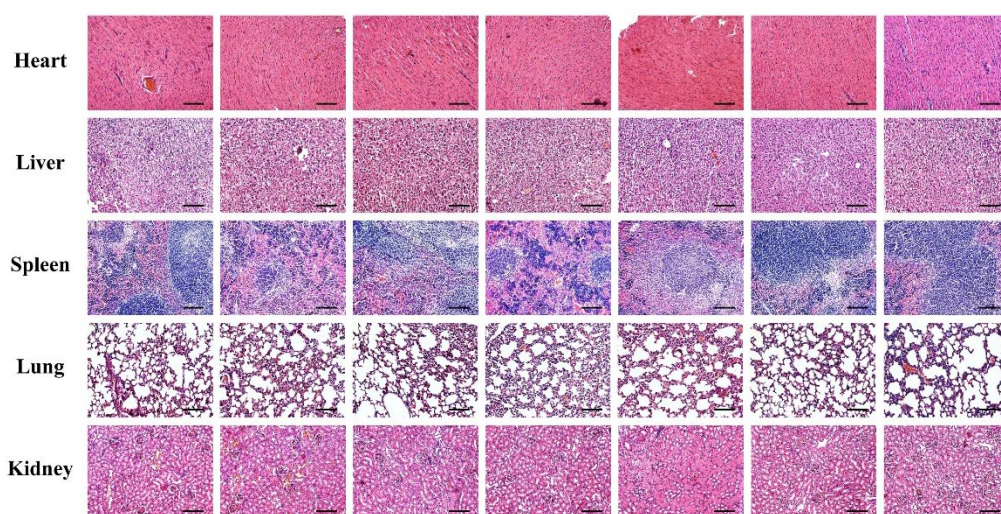

**Fig.S2** H&E staining of heart, lung, liver, kidney and spleen after different drug treatment. Scale bars, 200  $\mu$ m.

**Note:** Additional Western blot supplementary information uploaded on 29/07/2021.
